# Supplementary material
Source: publisher figshare collection journal article supplement (https://acs.figshare.com/ndownloader/files/5181883)
Supplement: Supplementary file 1 [file 5181883]

# Palladium-Catalyzed Ring Opening Reaction of Methyleneaziridines with Carboxylic Acids.

## Synthesis of $\beta$ -Amidoketones

*Byoung Ho Oh, Itaru Nakamura, and Yoshinori Yamamoto\**

Department of Chemistry, Graduate School of Science, Tohoku University, Sendai 980-8578,

Japan

Graphics for Table of Contents

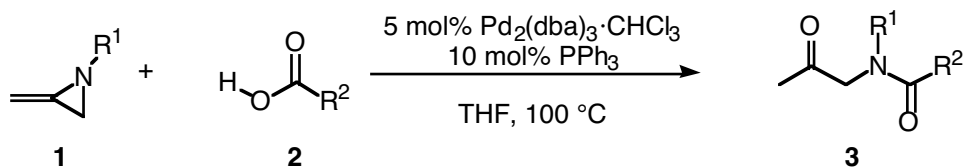

**General.** Spectroscopic measurements were carried out with the following instrument: JEOL JMMAL-300, JEOL JNM LA-300, JEOL JNM a-500 ( $^1\text{H}$  and  $^{13}\text{C}$  NMR). The  $\alpha$ -amido ketone **3** displayed major and minor isomer by  $^1\text{H}$  and  $^{13}\text{C}$  NMR at room temperature due to slow rotation.<sup>11</sup> SHIMADZU FTIR-8200A (FT-IR). Hitachi M-2500S, JEOL JMS-AX500, JEOL JMS-DX303 (high-resolution mass spectra). All methyleneaziridines were prepared following the reported procedure.<sup>1,2</sup>

**General procedure of ring opening reaction of methyleneaziridine **1** with carboxylic acid **2**.**

To a mixture of  $\text{Pd}_2(\text{dba})_3 \cdot \text{CHCl}_3$  (25.9 mg, 0.025 mmol) and triphenylphosphine (13.9 mg, 0.05 mmol) and the carboxylic acid **2** (0.5 mmol) in THF (1 mL) was added methyleneaziridine **1** (0.75 mmol) under Ar atmosphere in a pressure vial. After heating at 100 °C for 2-5 hours, the reaction mixture was filtered through a silica-gel column using ethyl acetate as an eluent. Separation by passing through a silica-gel column and purification by middle-pressure liquid column chromatography (silica gel) and recrystallization afforded  $\beta$ -amidoketone **3**.

**N-Benzyl-N-(2-oxo-propyl)-acetamide (3a).** White solid: IR (KBr) 3035-2937, 1728, 1633, 1494, 1469, 1454, 1419, 1359, 1247, 1168, 1026, 979, 742, 702, 661  $\text{cm}^{-1}$ .  $^1\text{H}$  NMR ( $\text{CDCl}_3$ , 500 MHz)  $\delta$  2.03 (s, 3H, minor), 2.08 (s, 3H, minor), 2.11 (s, 3H, major), 2.22 (s, 3H, major), 4.00 (s, 2H, minor), 4.12 (s, 2H, major), 4.58 (s, 2H, major), 4.60 (s, 2H, minor), 7.17-7.38 (m, 5H, major and m, 5H, minor).  $^{13}\text{C}$  NMR ( $\text{CDCl}_3$ , 125 MHz, M = major conformer, m = minor conformer)  $\delta$  1.10 (M), 21.29 (m), 26.98 (m), 27.22 (M), 49.46 (m), 52.84 (M), 54.79 (M), 57.07 (m), 126.58 (M), 127.55 (m), 127.80 (M), 128.30 (m), 128.58 (m), 128.91 (M), 136.01 (M), 136.69 (m), 170.95 (m), 171.21 (M), 202.67 (m), 203.14 (M). Anal. Calcd for  $\text{C}_{12}\text{H}_{15}\text{NO}_2$  (205.25): C, 70.22; H, 7.37; N, 6.82. Found: C, 70.03; H, 7.50; N, 6.56. HRMS (EI) Calcd for  $\text{C}_{12}\text{H}_{15}\text{NO}_2$ : m/z 205.1103. Found: m/z 205.1104.

**N-Benzyl-N-(2-oxo-propyl)-acetamide (3b).** Pale yellow solid: IR (KBr) 2916, 1728, 1631, 1496, 1465, 1431, 1398, 1363, 1298, 1257, 1170, 1149, 1049, 1026, 975, 790, 725, 698  $\text{cm}^{-1}$ .  $^1\text{H}$  NMR ( $\text{CDCl}_3$ , 300 MHz)  $\delta$  1.89 (s, 3H, minor), 2.16 (s, 3H, major), 3.91 (s, 2H, minor), 4.21 (s, 2H, major), 4.58 (s, 2H, major), 4.78 (s, 2H, minor), 7.17-7.54 (m, 10H, major and m, 10H, minor).  $^{13}\text{C}$  NMR ( $\text{CDCl}_3$ , 75 MHz, M = major conformer, m = minor conformer)  $\delta$  26.96 (m), 27.44 (M), 48.88 (m), 53.72 (M), 54.01 (M), 57.44 (m), 126.24 (m), 126.82 (M), 126.87 (M), 127.66 (m), 127.76 (M), 128.37 (m), 128.44 (M), 128.53 (m), 128.71 (m), 128.87 (M), 129.71 (m), 129.88 (M), 135.15 (M), 135.84 (m), 136.12 (M), 136.37 (m), 172.16 (m), 172.32 (M), 202.53 (M), 203.01 (m). Anal. Calcd for  $\text{C}_{17}\text{H}_{17}\text{NO}_2$  (267.32): C, 76.38; H, 6.41; N, 5.24. Found: C, 76.09; H, 6.36; N, 5.18. HRMS (EI) Calcd for  $\text{C}_{17}\text{H}_{17}\text{NO}_2$ : m/z 267.1259. Found: m/z 267.1255.

**Pent-2-enoic acid benzyl-(2-oxo-propyl)-amide (3c).** Pale yellow oil: IR (neat) 2966, 2933, 1732, 1660, 1622, 1434, 1398, 1359, 1211, 1168, 1082, 700  $\text{cm}^{-1}$ .  $^1\text{H}$  NMR ( $\text{CDCl}_3$ , 300 MHz)  $\delta$  1.04 (t,  $J = 7.5$  Hz, 3H, major and 3H, minor), 2.08 (s, 3H, minor), 2.13 (s, 3H, major), 2.17-2.27 (m, 2H, major and m, 2H, minor), 4.06 (s, 2H, minor), 4.15 (s, 2H, major), 4.66 (s, 2H, major), 4.67 (s, 2H, minor), 5.92 (d,  $J = 15$  Hz, 1H, minor), 6.28 (d,  $J = 15$  Hz, 1H, major), 6.99-7.39 (m, 6H, major and m, 6H, minor).  $^{13}\text{C}$  NMR ( $\text{CDCl}_3$ , 75 MHz, M = major conformer, m = minor conformer)  $\delta$  12.50 (M and m), 25.63 (M and m), 27.03 (m), 27.33 (M), 50.10 (m), 52.14 (M),

55.47 (M), 56.57 (m), 118.31 (M), 118.38 (m), 126.60 (M), 127.48 (m), 127.65 (M), 128.30 (m), 128.51 (m), 128.77 (M), 136.9 (M), 136.65 (m), 149.27 (m), 149.57 (M), 167.16 (m), 167.35 (M), 203.07 (M and m). HRMS (EI) Calcd for C<sub>15</sub>H<sub>19</sub>NO<sub>2</sub>: m/z 245.1416. Found: m/z 245.1417.

***N*-[*Benzyl*-(2-oxo-propyl)-carbamoyl]-methyl-benzamide (3d).** Colorless oil: IR (neat) 3400, 3359, 3349, 1732, 1668, 1558, 1361, 1224, 1168, 1058, 731 cm<sup>-1</sup>. <sup>1</sup>H NMR (CDCl<sub>3</sub>, 300 MHz)  $\delta$  2.10 (s, 3H, minor), 2.11 (s, 3H, major), 4.09-4.11 (m, 4H, minor), 4.15 (s, 2H, major), 4.44 (d, *J* = 4.2 Hz, 2H), 4.58 (s, 2H, major), 4.63 (s, 2H, minor), 7.18-7.51 (m, 8H, major and m, 8H, minor), 7.81-7.85 (m, 2H, major and m, 2H, minor). <sup>13</sup>C NMR (CDCl<sub>3</sub>, 75 MHz, M = major conformer, m = minor conformer)  $\delta$  7.13 (m), 27.20 (M), 41.55 (m), 41.63 (M), 50.16 (m), 51.20 (M), 55.07 (M), 55.31 (m), 126.84 (M and m), 126.90 (M and m), 128.06 (M), 128.17 (m), 128.27 (m), 128.33 (M), 128.64 (m), 128.95 (M), 131.41 (M and m), 133.58 (m), 133.66 (M), 134.71 (M), 135.69 (m), 166.90 (m), 166.93 (M), 168.86 (m), 168.90 (M), 201.63 (m), 201.89 (M). HRMS (EI) Calcd for C<sub>19</sub>H<sub>20</sub>N<sub>2</sub>O<sub>3</sub>: m/z 324.1474. Found: m/z 324.1476.

***N*-Hexyl-*N*-(2-oxo-propyl)-benzamide (3e).** Yellow oil: IR (neat) 2929, 2858, 1732, 1638, 1431, 1170, 1110, 702 cm<sup>-1</sup>. <sup>1</sup>H NMR (CDCl<sub>3</sub>, 300 MHz)  $\delta$  0.76-0.86 (m, 3H, major and m, 3H, minor), 1.09-1.55 (m, 8H, major and m, 8H, minor), 1.93 (s, 3H, minor), 2.20 (s, 3H, major), 3.20 (t, *J* = 7.8 Hz, 2H, major), 3.43 (t, *J* = 7.8 Hz, 2H, minor), 3.99 (s, 2H, minor), 4.22 (s, 2H, major), 7.24-7.38 (m, 5H, major and m, 5H, minor). <sup>13</sup>C NMR (CDCl<sub>3</sub>, 75 MHz, M = major conformer, m = minor conformer)  $\delta$  3.82 (M), 13.93 (m), 22.34 (M), 22.51 (m), 26.02 (M), 26.55 (m), 26.90 (m), 27.12 (m), 27.34 (M), 28.41 (M), 31.12 (M), 31.51 (m), 46.83 (m), 50.31 (M), 54.69 (M), 58.97 (m), 126.16 (m), 126.58 (M), 128.33 (M and m), 129.45 (M and m), 135.92 (M), 136.45 (m), 171.89 (m), 172.03 (M), 202.92 (M), 203.20 (m). HRMS (EI) Calcd for C<sub>16</sub>H<sub>23</sub>NO<sub>2</sub>: m/z 261.1729. Found: m/z 261.1733.

***N*-Hexyl-*N*-(2-oxo-propyl)-benzamide (3f).** Yellow oil: IR (neat) 2958, 2931, 2873, 1732, 1633, 1431, 1172, 1105, 702 cm<sup>-1</sup>. <sup>1</sup>H NMR (CDCl<sub>3</sub>, 300 MHz)  $\delta$  0.79 (t, *J* = 7.2 Hz, 3H, major), 0.96 (t, *J* = 7.2 Hz, 3H, minor), 1.11-1.59 (m, 4H, major and m, 4H, minor), 1.97 (s, 3H, minor), 2.24 (s, 3H, major), 3.25 (t, *J* = 7.5 Hz, 2H, major), 3.47 (t, *J* = 7.5 Hz, 2H, minor), 4.04 (s, 2H, minor), 4.26 (s, 2H, major), 7.28-7.41 (m, 5H, major and m, 5H, minor). <sup>13</sup>C NMR (CDCl<sub>3</sub>, 75 MHz, M = major conformer, m = minor conformer)  $\delta$  13.57 (M), 13.89 (m), 19.67 (M), 20.21 (m), 26.98 (m), 27.42 (M), 29.32 (m), 30.66 (M), 46.64 (m), 50.16 (M), 54.77 (M), 59.03 (m), 126.22 (m), 126.67 (M), 128.41 (M and m), 129.53 (M and m), 135.99 (M), 136.51 (m), 172.05 (m), 172.10 (M), 202.99 (M), 203.35 (m). HRMS (EI) Calcd for C<sub>14</sub>H<sub>19</sub>NO<sub>2</sub>: m/z 233.1416. Found: m/z 233.1418.

***N*-(3-Methoxy-propyl)-*N*-(2-oxo-propyl)-benzamide (3g).** Colorless oil: IR (neat) 2925, 1732, 1633, 1446, 1168, 1116, 665 cm<sup>-1</sup>. <sup>1</sup>H NMR (CDCl<sub>3</sub>, 300 MHz)  $\delta$  1.70-1.77 (m, 2H, major), 1.92-1.96 (m, 5H, minor), 2.24 (s, 3H, major), 3.20 (s, 3H, major), 3.25 (t, *J* = 6.0 Hz, 2H, major), 3.34-3.40 (m, 2H, major and m, 3H, minor), 3.47 (t, *J* = 6.0 Hz, 2H, minor), 3.56 (t, *J* = 6.0 Hz, 2H, minor), 4.07 (s, 2H, minor), 4.28 (s, 2H, major), 7.28-7.41 (m, 5H, major and m, 5H, minor). <sup>13</sup>C NMR (CDCl<sub>3</sub>, 75 MHz, M = major conformer, m = minor conformer)  $\delta$  26.96 (m), 27.42 (M), 27.54 (m), 28.90 (M), 44.77 (m), 47.69 (M), 55.10 (M), 58.52 (M), 58.61 (m), 59.59 (m), 69.30 (M), 70.23 (m), 126.22 (m), 126.66 (M), 128.41 (M), 128.49 (m), 128.52 (m), 129.58 (M), 135.85 (M), 136.36 (m), 172.14 (m), 172.23 (M), 202.84 (M), 203.27 (m). HRMS (EI) Calcd for

$C_{14}H_{19}NO_3$ : m/z 249.1365. Found: m/z 249.1368.

***N*-(2,2-Dimethoxy-ethyl)-*N*-(2-oxo-propyl)-benzamide (3h).** Colorless oil: IR (neat) 2935, 1716, 1645, 1471, 1442, 1361, 1161, 1080, 1020, 754  $cm^{-1}$ .  $^1H$  NMR ( $CDCl_3$ , 300 MHz)  $\delta$  1.95 (s, 3H, minor), 2.21 (s, 3H, major), 3.23 (s, 6H, major), 3.36 (d,  $J = 5.7$  Hz, 2H, major), 3.42 (s, 6H, minor), 3.60 (d,  $J = 5.7$  Hz, 2H, minor), 4.20 (s, 2H, minor), 4.30 (t,  $J = 5.7$  Hz, 1H, major), 4.43 (s, 2H, major), 4.57 (t,  $J = 5.7$  Hz, 1H, minor), 7.33-7.43 (m, 5H, major and m, 5H, minor).  $^{13}C$  NMR ( $CDCl_3$ , 75 MHz, M = major conformer, m = minor conformer)  $\delta$  26.84 (m), 27.23 (M), 49.12 (m), 52.20 (M), 54.66 (M), 55.02 (m), 56.22 (M), 60.20 (m), 103.55 (m), 103.65 (m), 104.16 (M), 104.24 (M), 126.31 (M and m), 126.60 (M and m), 128.37 (M and m), 129.49 (M and m), 135.71 (M), 135.86 (m), 172.20 (M), 172.39 (m), 202.34 (M), 202.62 (m). HRMS (EI) Calcd for  $C_{14}H_{19}NO_4$ : m/z 265.1314. Found: m/z 265.1313.

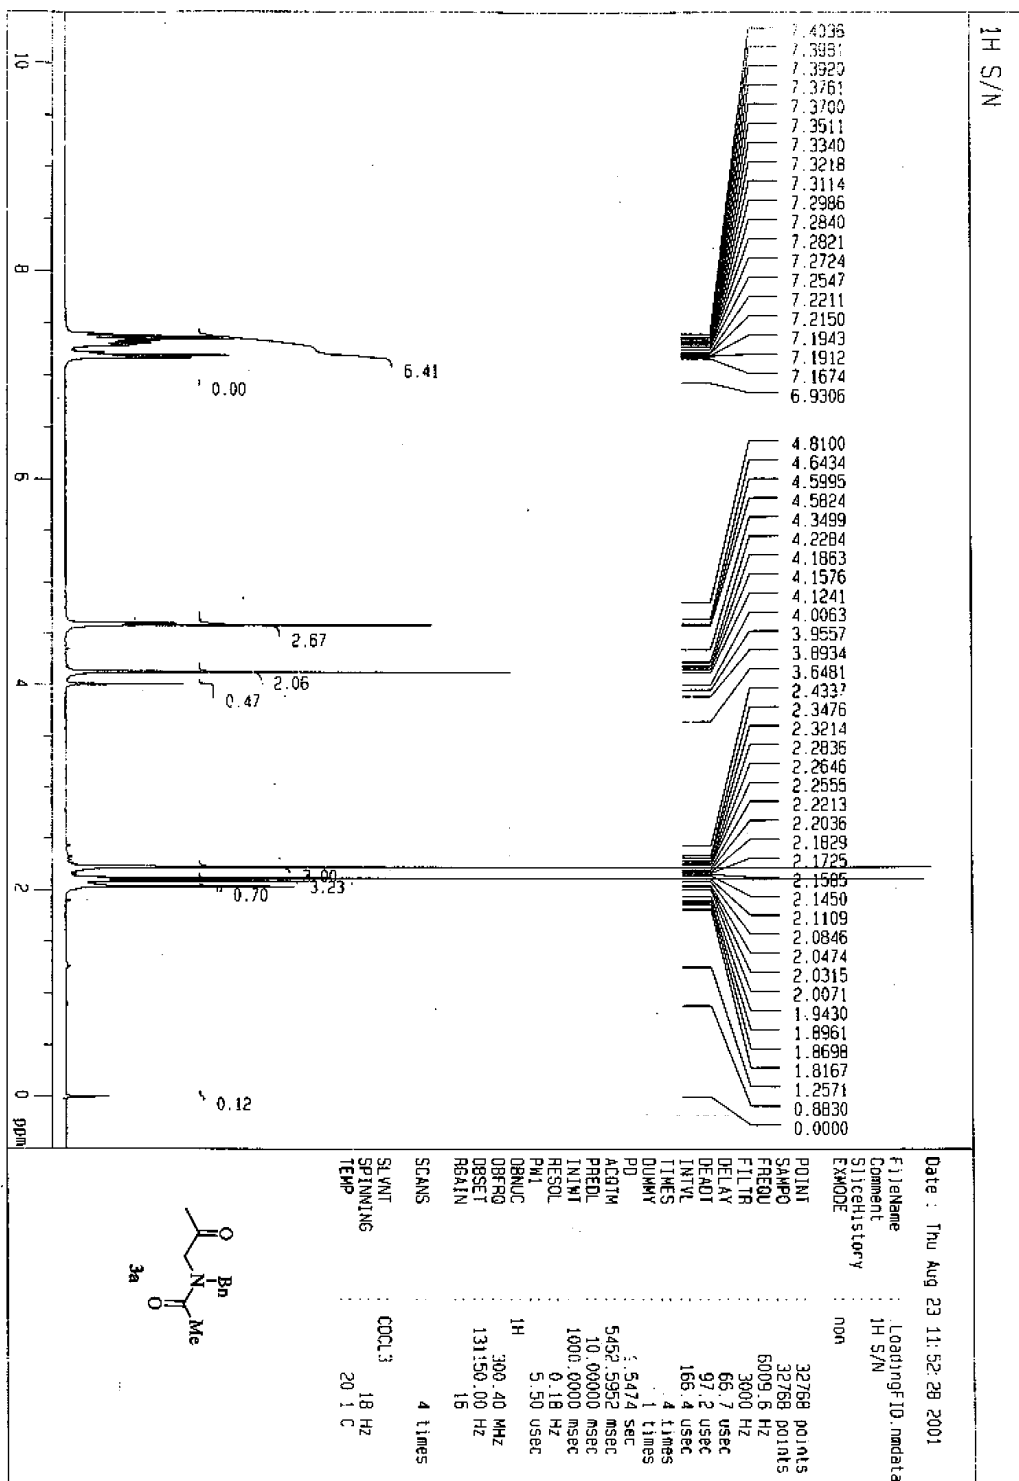

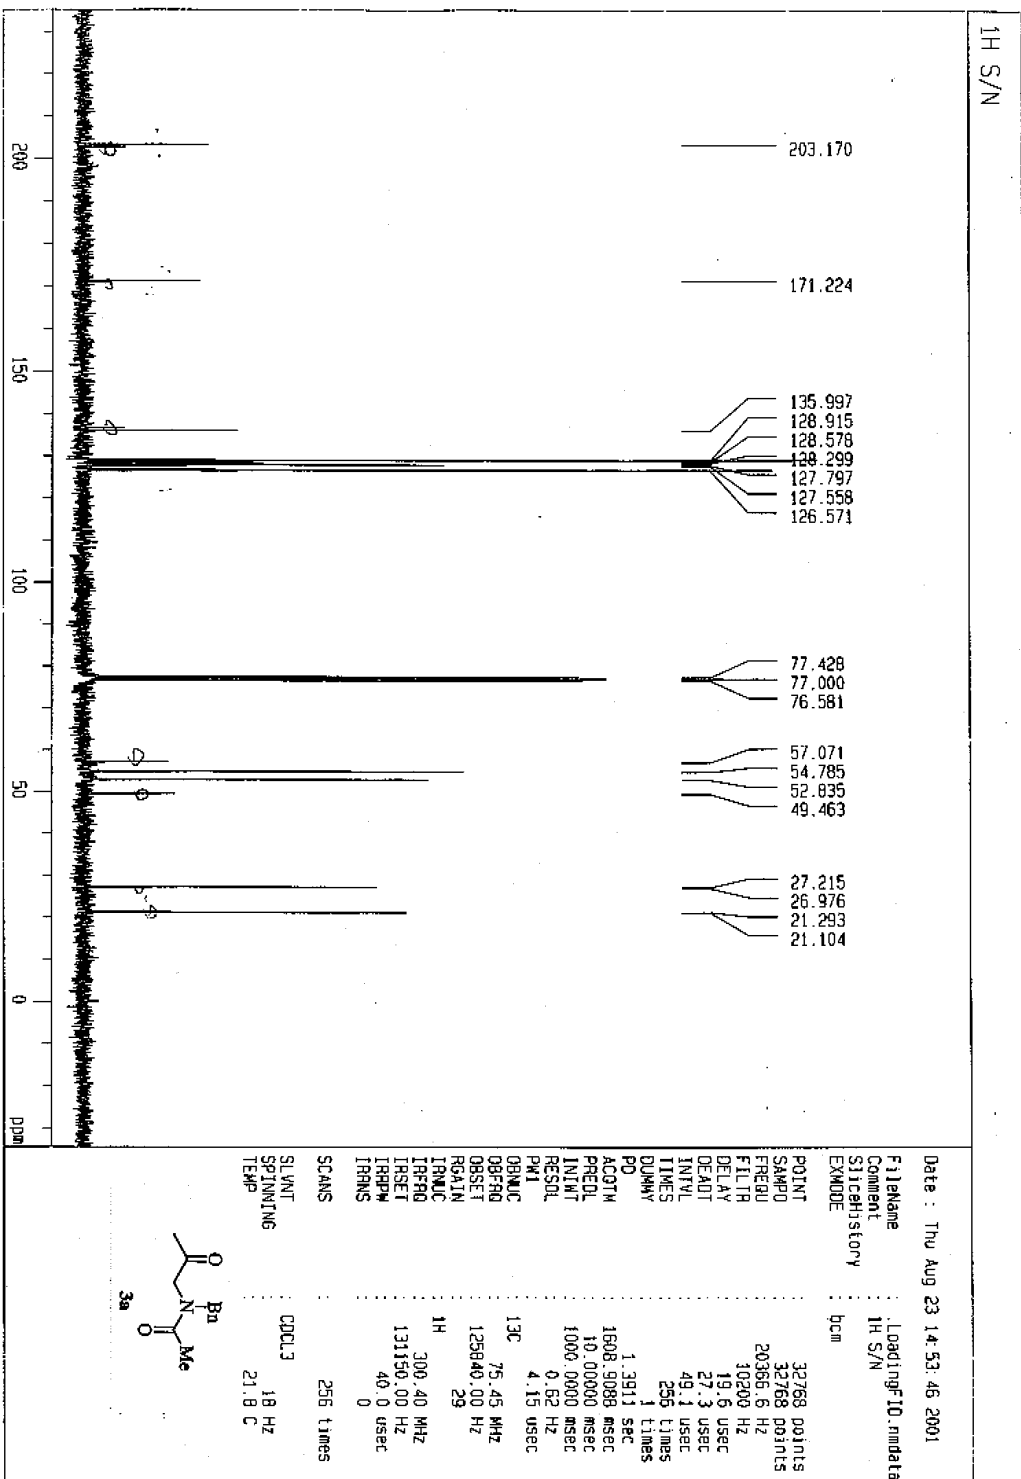

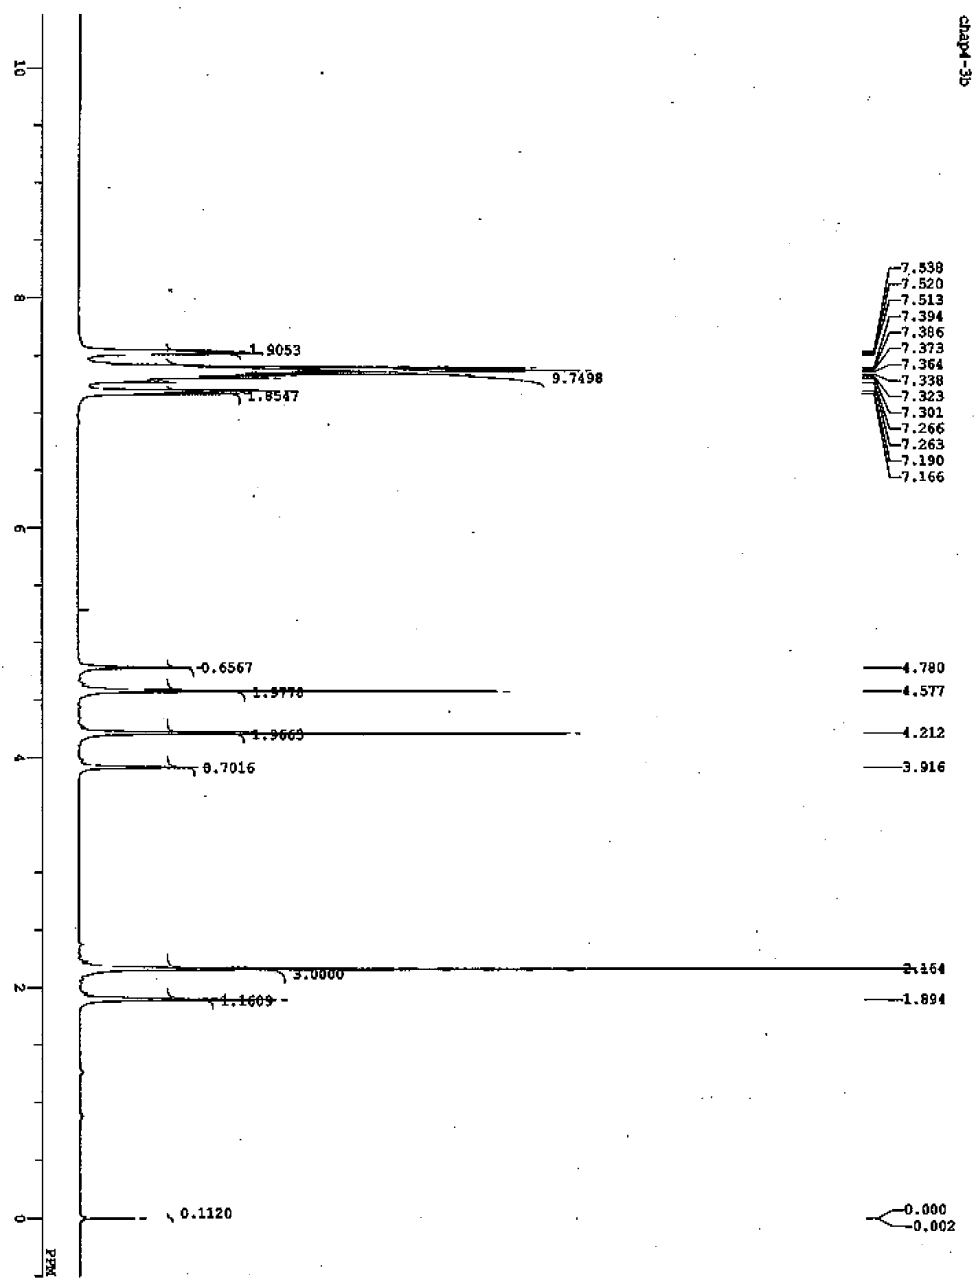

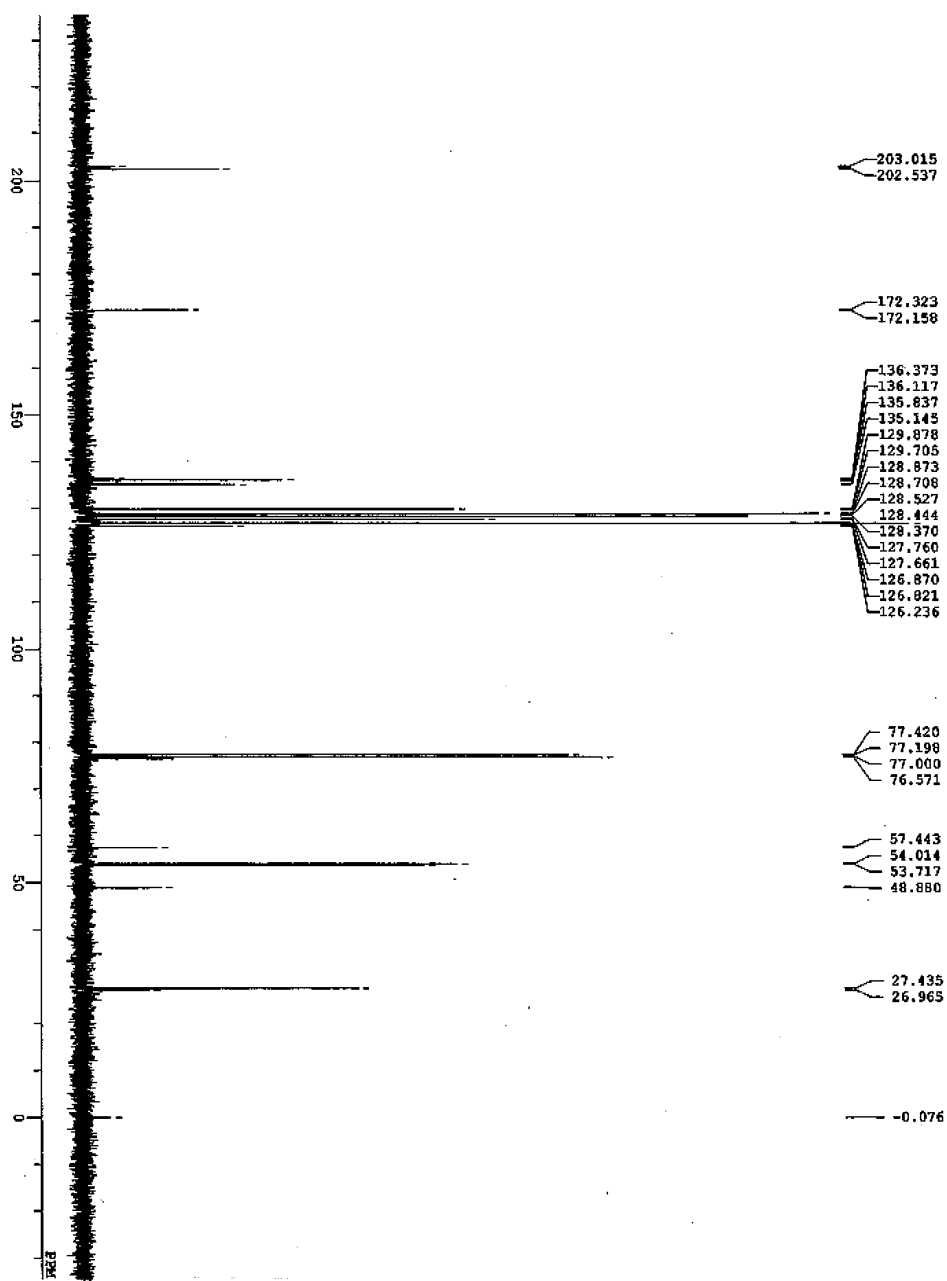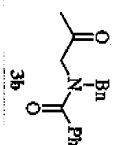



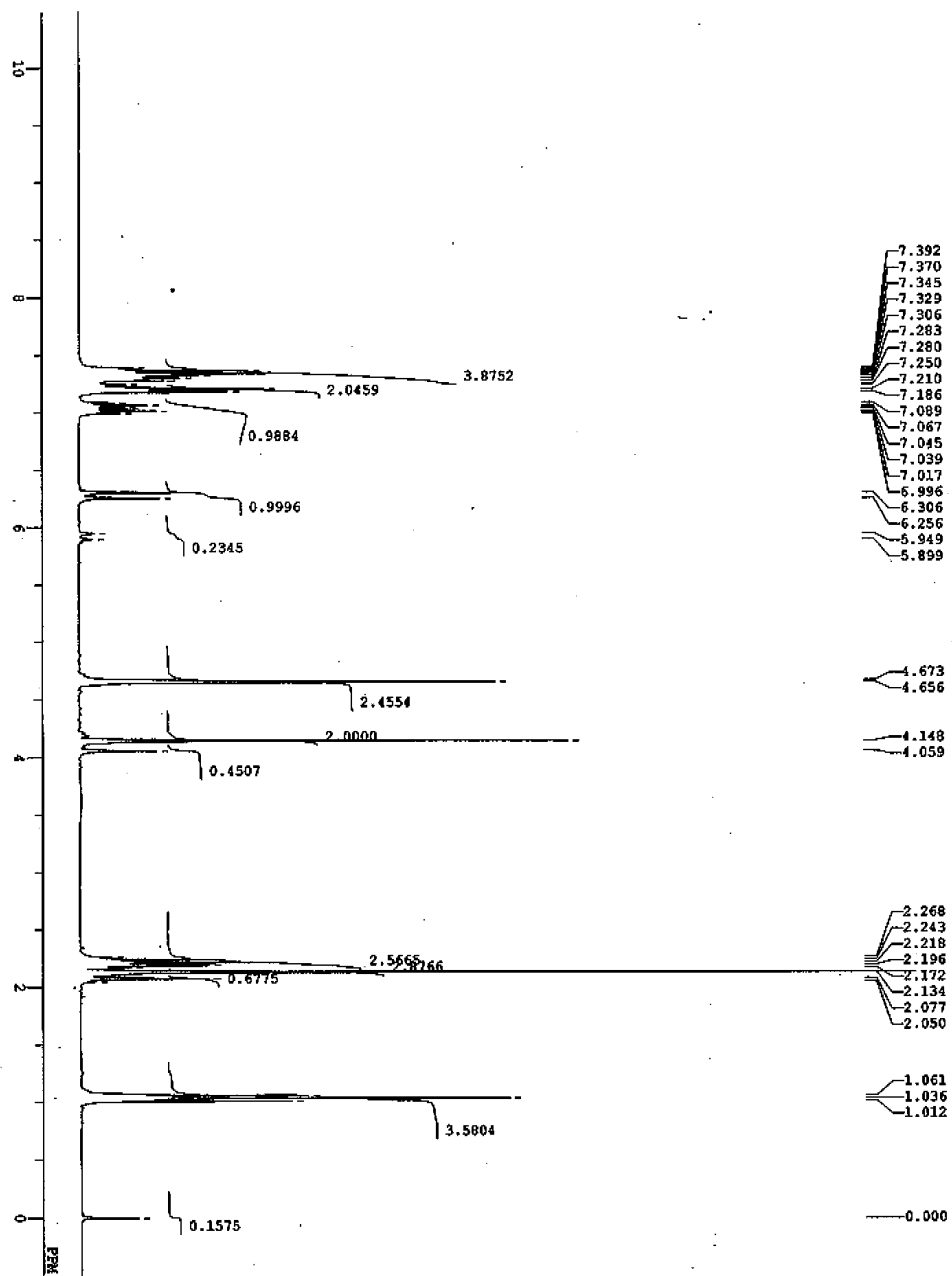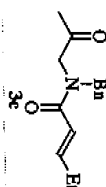

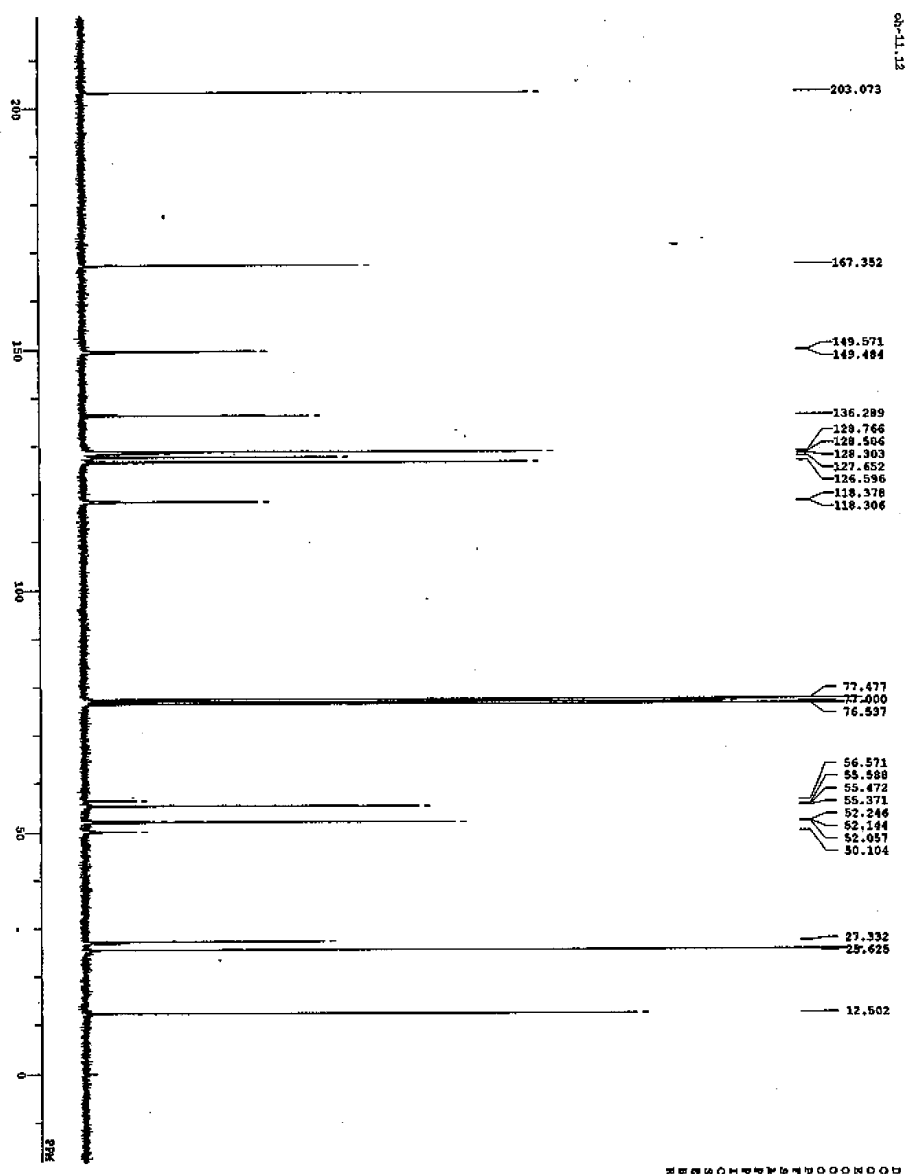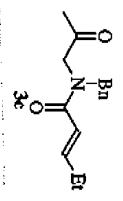

```

TITLE C:\WINNERS\COMMON\DEFAULT.AL
COMPT 08-11.12
ORIG 13C
P2N
PRIN 67.80 MHz
CHRO 135.00 MHz
PROB 5MMQNP1H
PULP zgpg30
AQ 5200.0 Hz
RG 141834 Hz
SFO 400.146 MHz
SCANS 1762
ACQTS 1.017 sec
RG 1.000 sec
PR 4.0 us
TD 65536
FIDRES 1.0 us
TEMP 25.3 c
SOLVENT CDCl3
SOLNT 77.00 DMS
SOLNT 77.00 DMS
NS 31
REALN
  
```

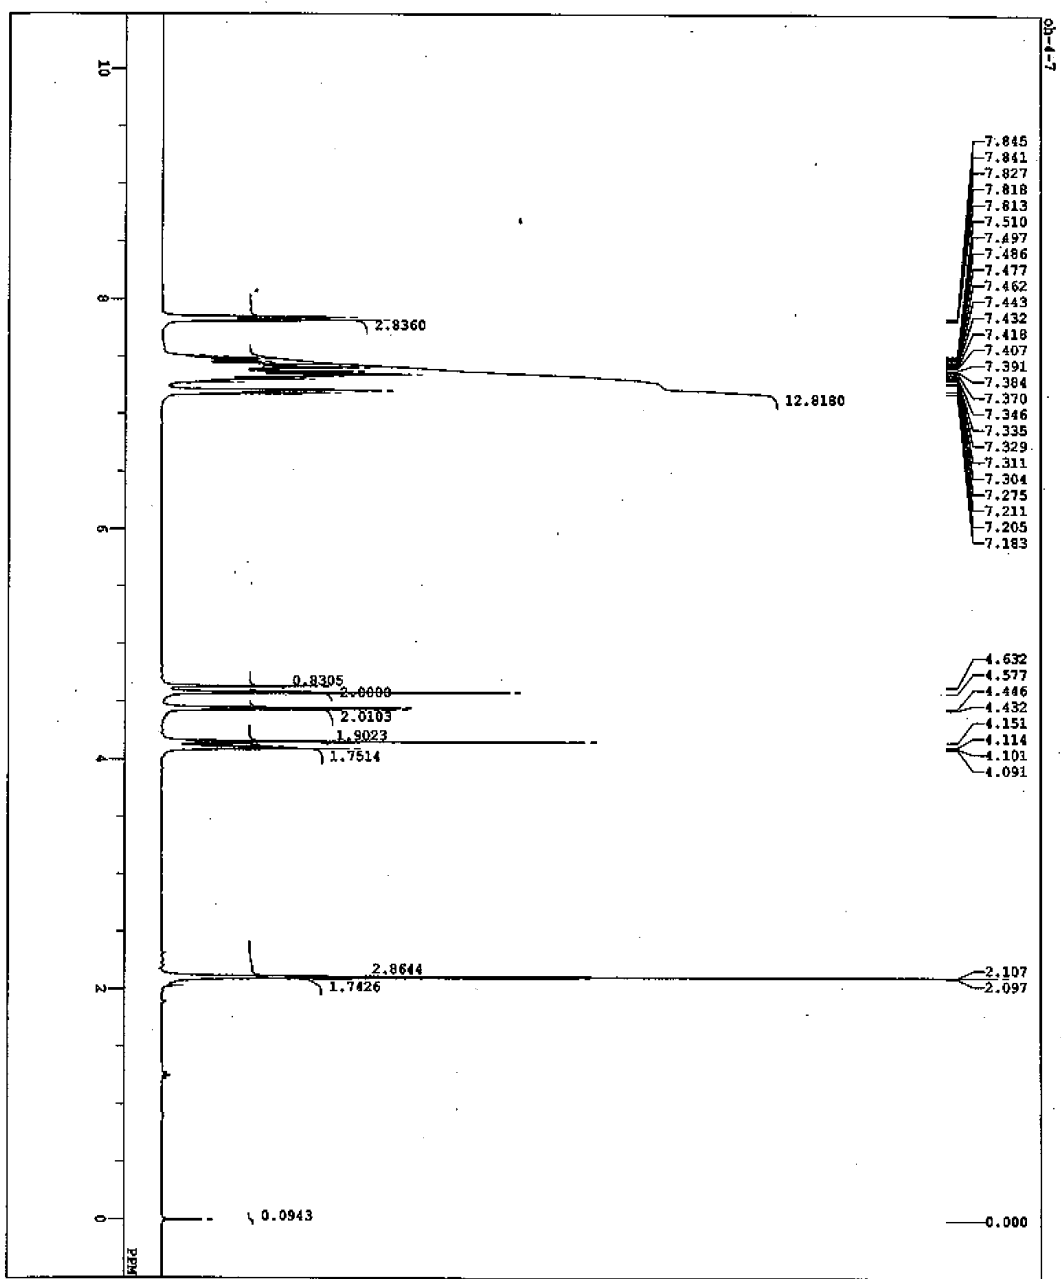

D:\FILE C:\VWINN95\COMMON\  
 CONTC 04-4-7  
 DATEM Tue Nov 19 14:06:18  
 ORENDC 1H  
 EXORD NON  
 OBFRO 300.40 MHz  
 OBFST 130.00 MHz  
 OBF1M 1150.0 Hz  
 POINT 16384  
 FREQD 3300.3 Hz  
 SCANS 8  
 ACQTM 4.964 sec  
 PD 1.551 sec  
 PUL 5.3 us  
 IREUC 1H  
 CTRDP 23.1 c  
 STVRF C0013  
 SWEET 0.00 ppm  
 BR 0.13 Hz  
 12  
 KSAIN

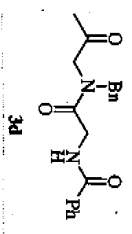

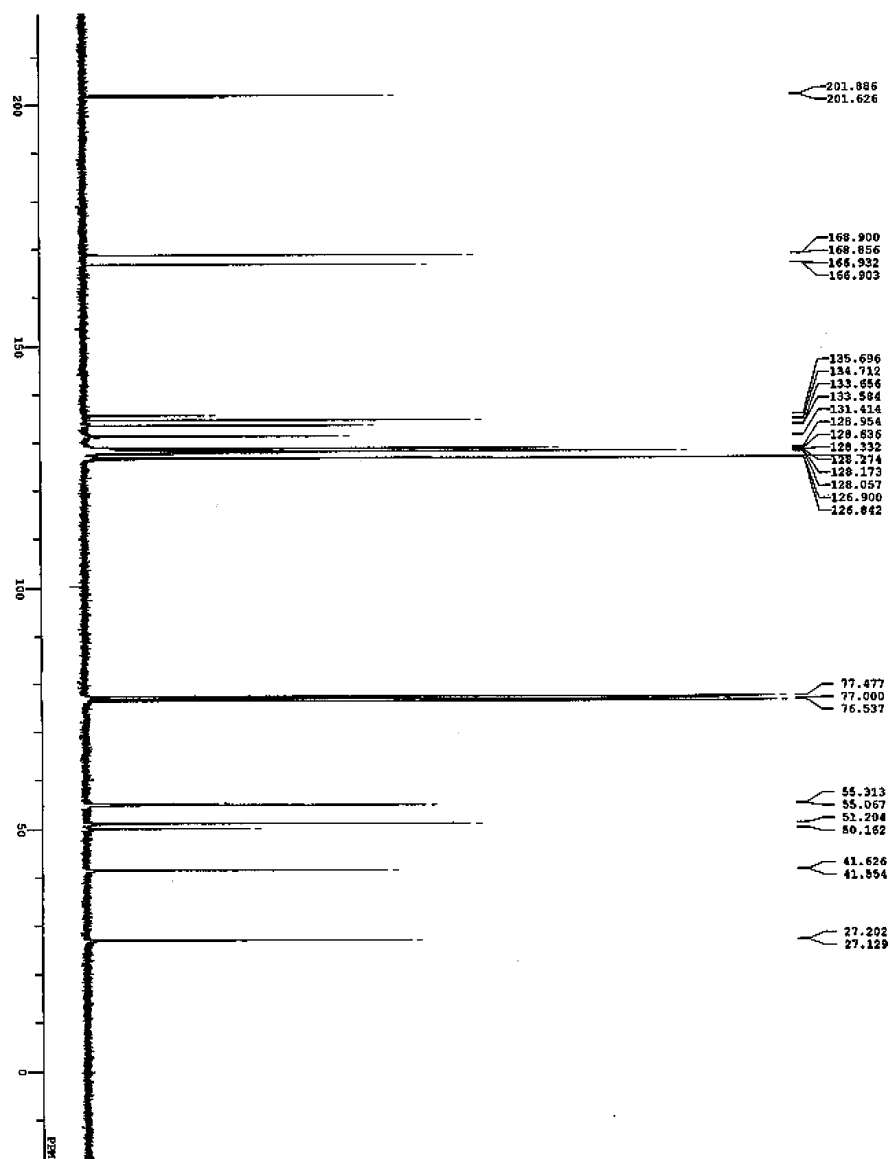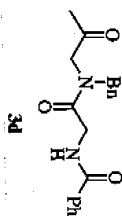

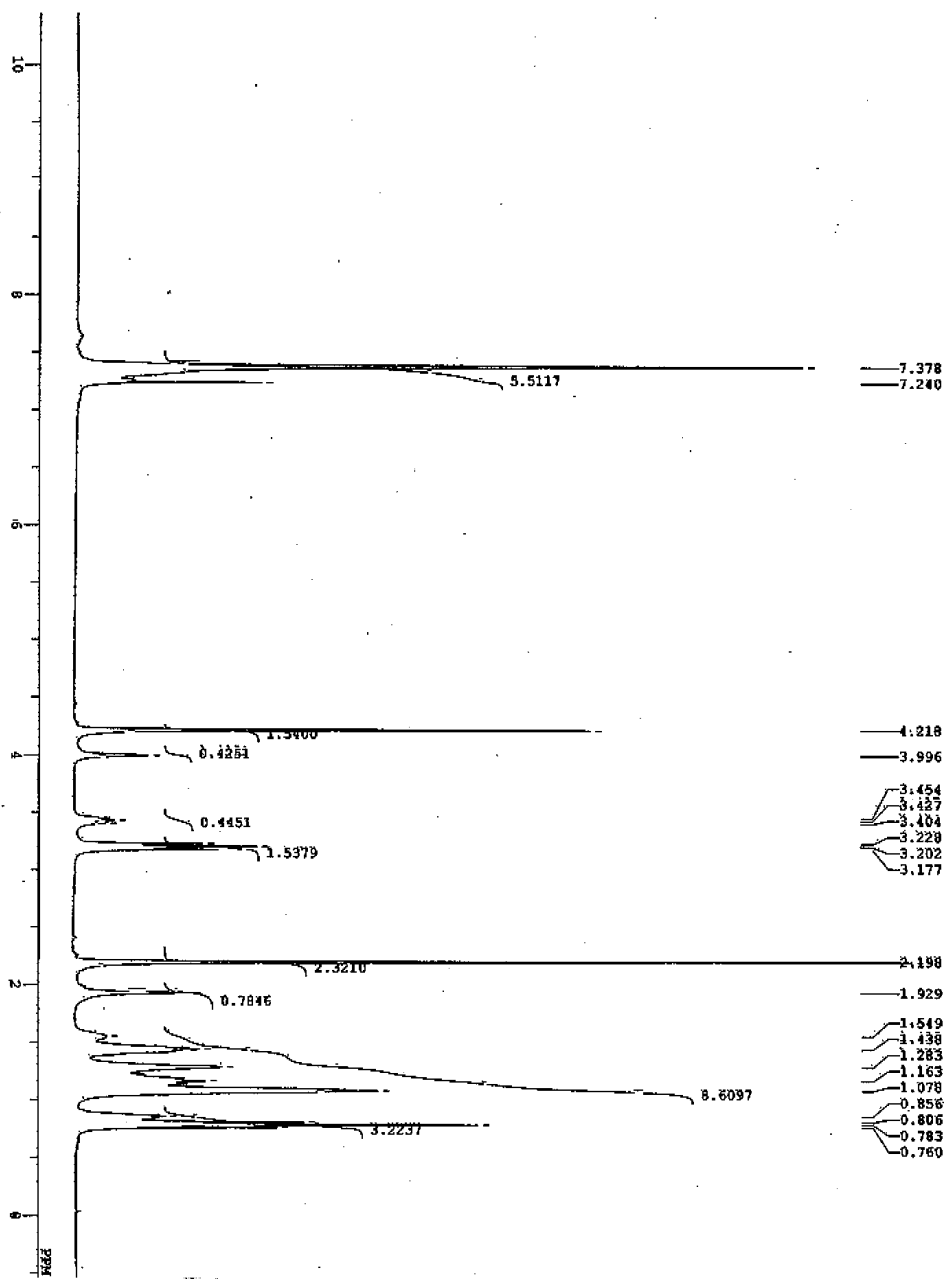

```
DTITLE C:\WIN95\COMMON\
CQRT  SAT Nov 23 19:19:38
DATE
DINUC  LH
NAME  NCH
PNAME  300.40 Mhz
OSSET  130.00 kHz
PREFL  148.00 Hz
PFRFD  3500.3 Hz
SCANS  8
ACQTM  4.964 sec
PD      1.891 sec
PUL     5.3 us
TEMRG  1H  23.7 c
CNAME  CDD13
SNAME  7.24 ppm
EXRF  0.13 Hz
BE     13
RGAIN
```

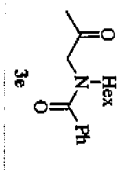

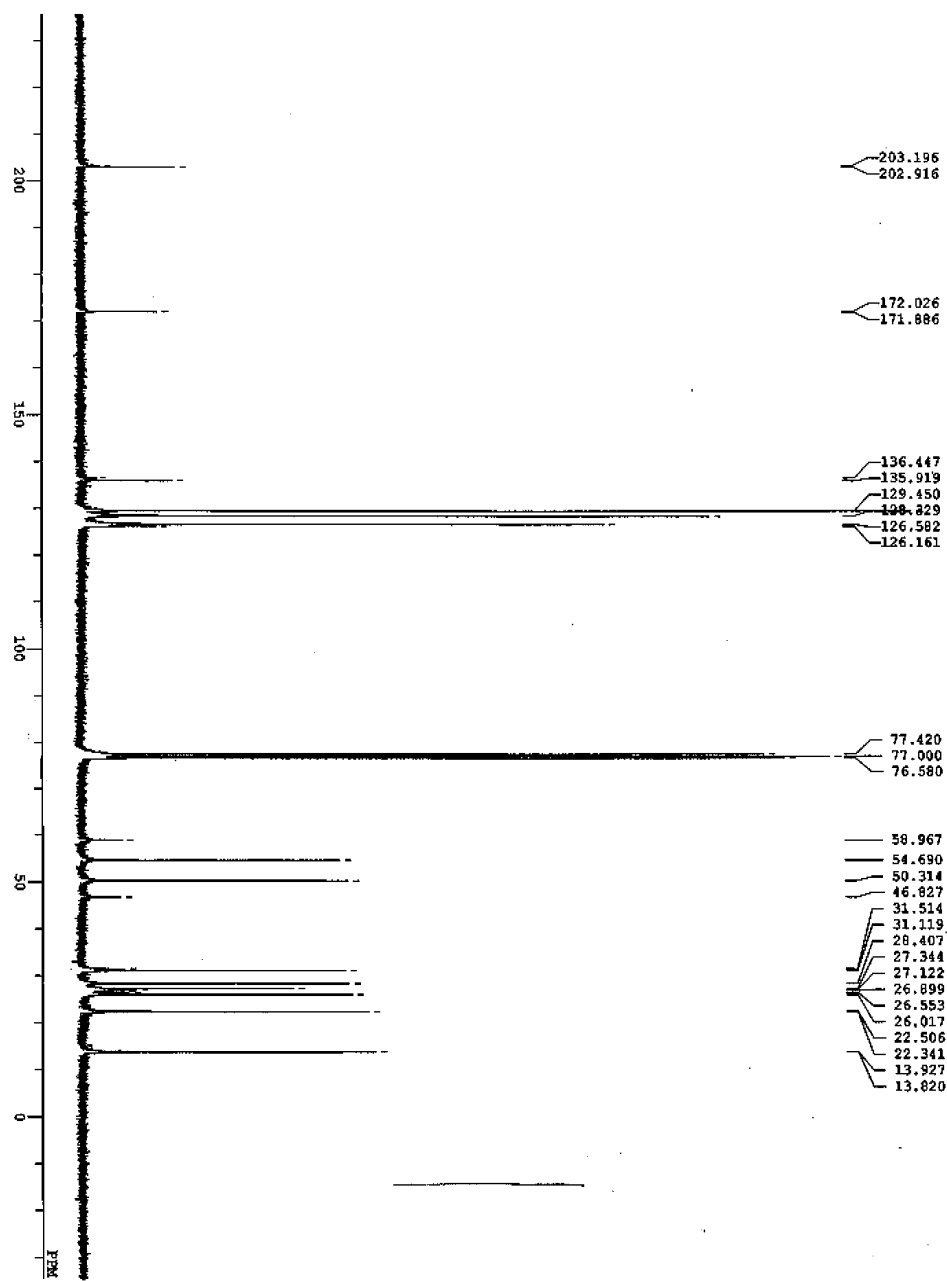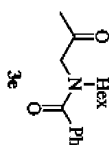

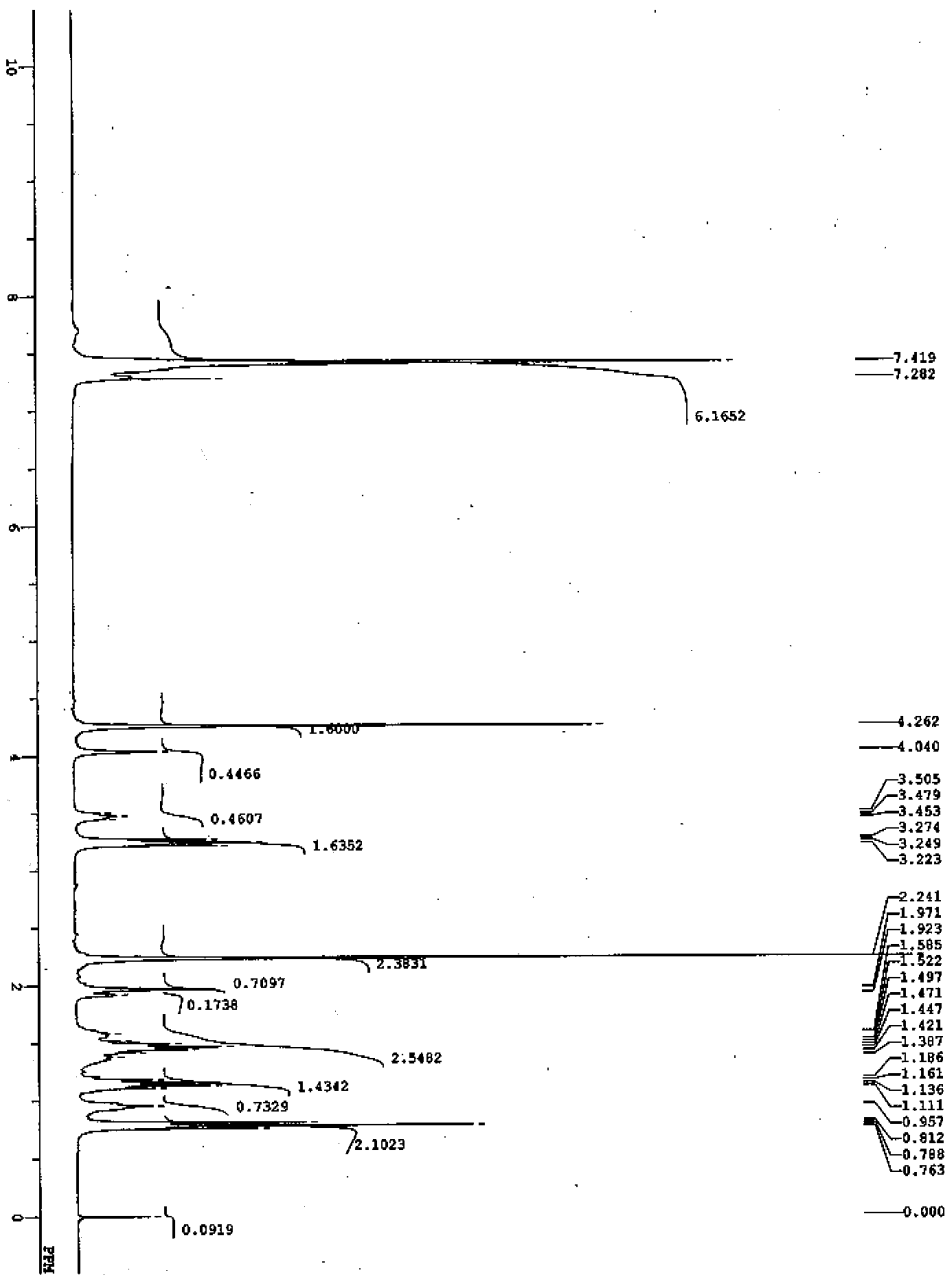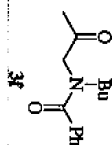

D:\WINNER93\COMMON\  
 CONANT  
 DATE Wed Nov 20 00:07:27  
 CHMTC 1H  
 EXPTD MON  
 CHMTC 300.40 MHz  
 CHMTC 130.00 kHz  
 CHMTC 1150.0 Hz  
 POINT 16384  
 FREQD 3900.3 Hz  
 SCANS 8  
 ACQTM 4.964 sec  
 PD 1.551 sec  
 PUL 5.3 us  
 INJTC 1H  
 CTMPC 20.3 c  
 CHMTC CXC13  
 SIVM 0.00 ppm  
 EXPT 0.13 Hz  
 BR 13  
 NVALM

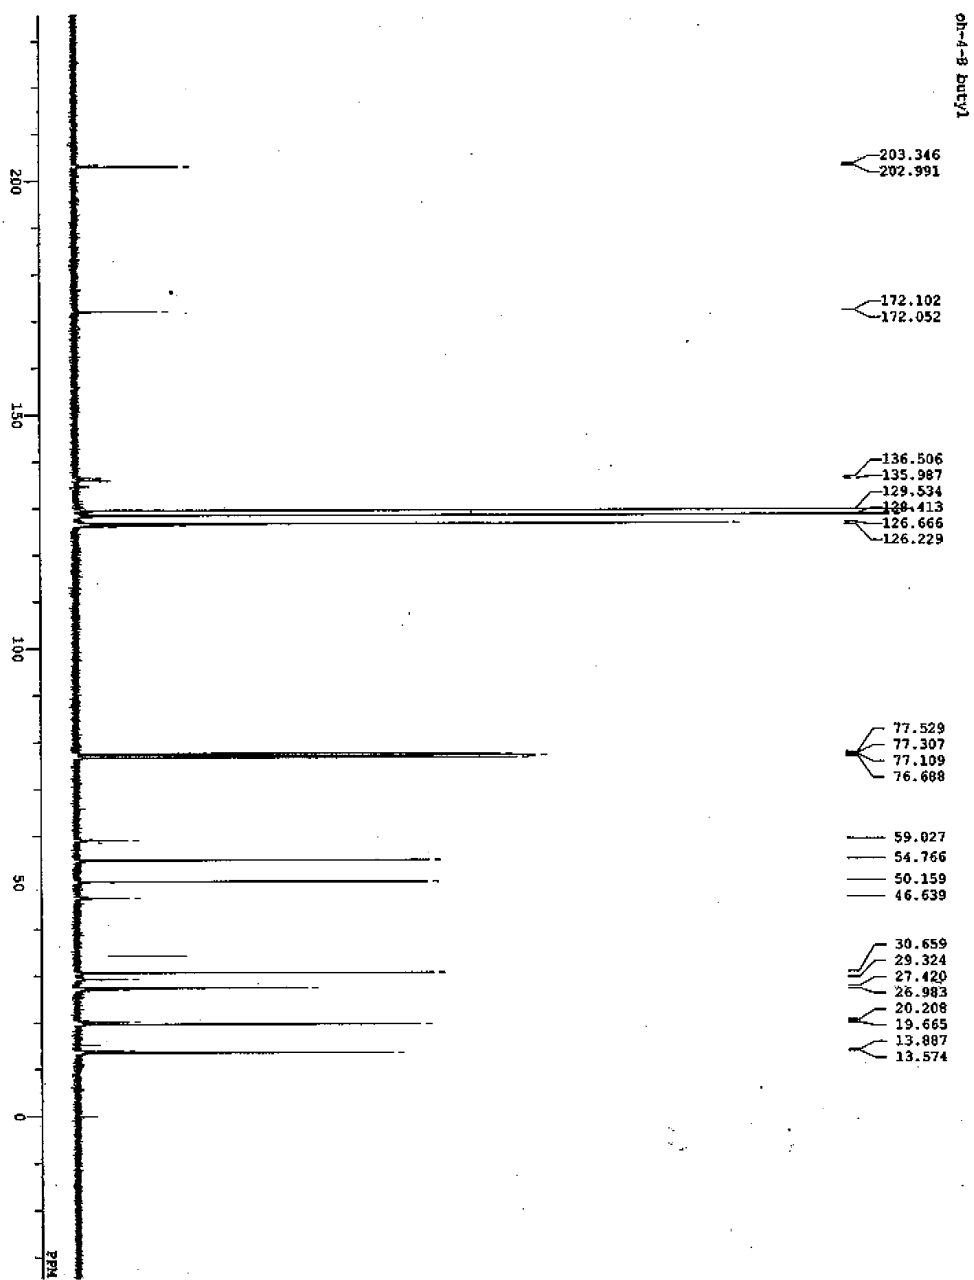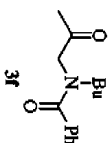



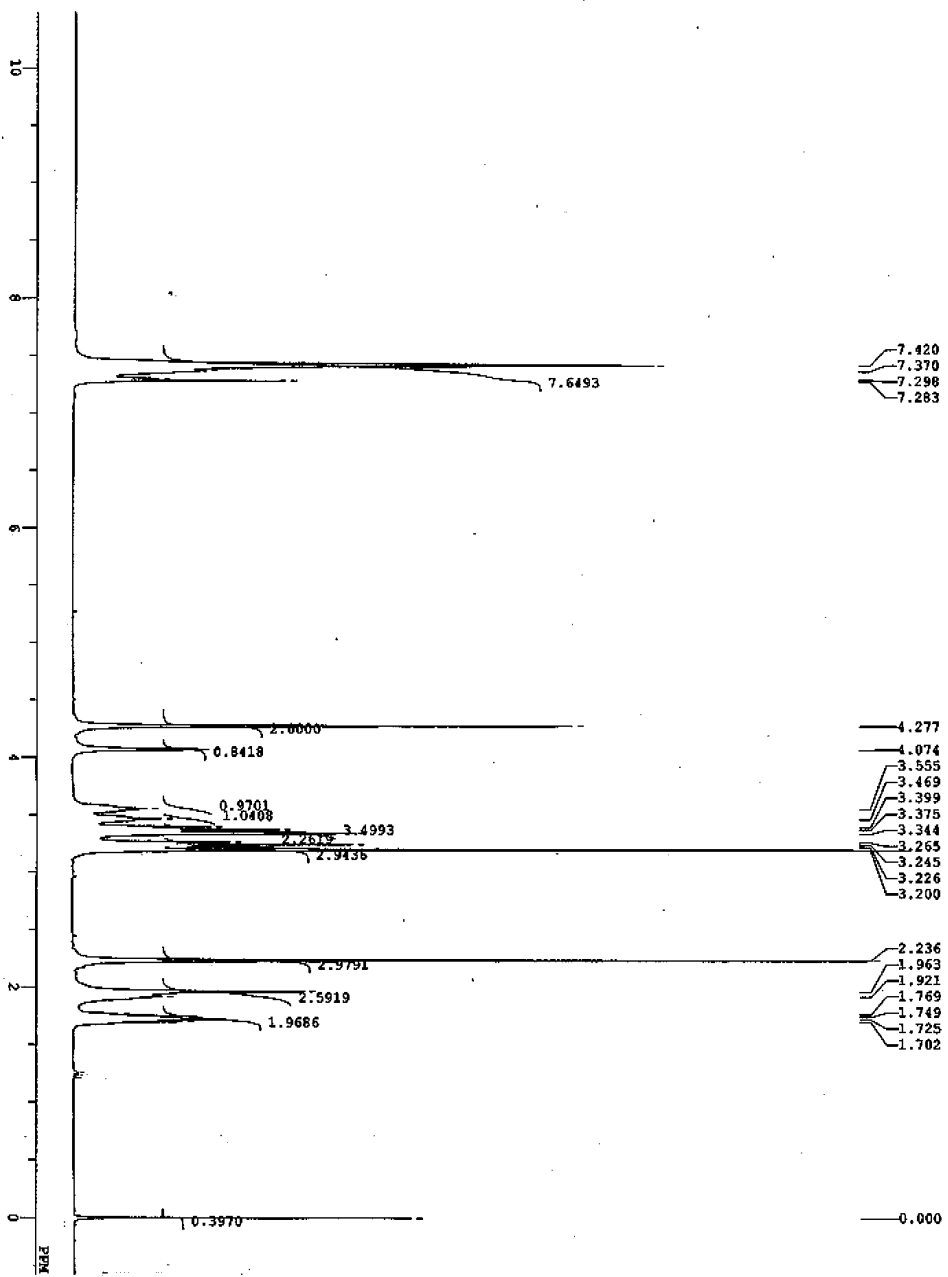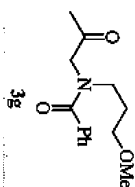

DFILE C:\WINNR95\COMMON\  
 COMPT T09 Nov 12 18:25:36  
 DATEI 1H  
 ORBIC 1H  
 EXMOD MON  
 OBFRC 300.40 MHz  
 OBFET 130.00 kHz  
 OBFIN 1150.0 Hz  
 POINT 16384  
 FREQU 3300.3 Hz  
 SCANS 32  
 ACQTM 4.964 sec  
 PD 1.551 sec  
 PFI 5.3 us  
 TRUNC 1H  
 CTDPF 21.8 c  
 STVPT CDCl3  
 SLYWT 0.00 ppm  
 EXREF 0.12 Hz  
 BP 13  
 RGAIN 13

3h

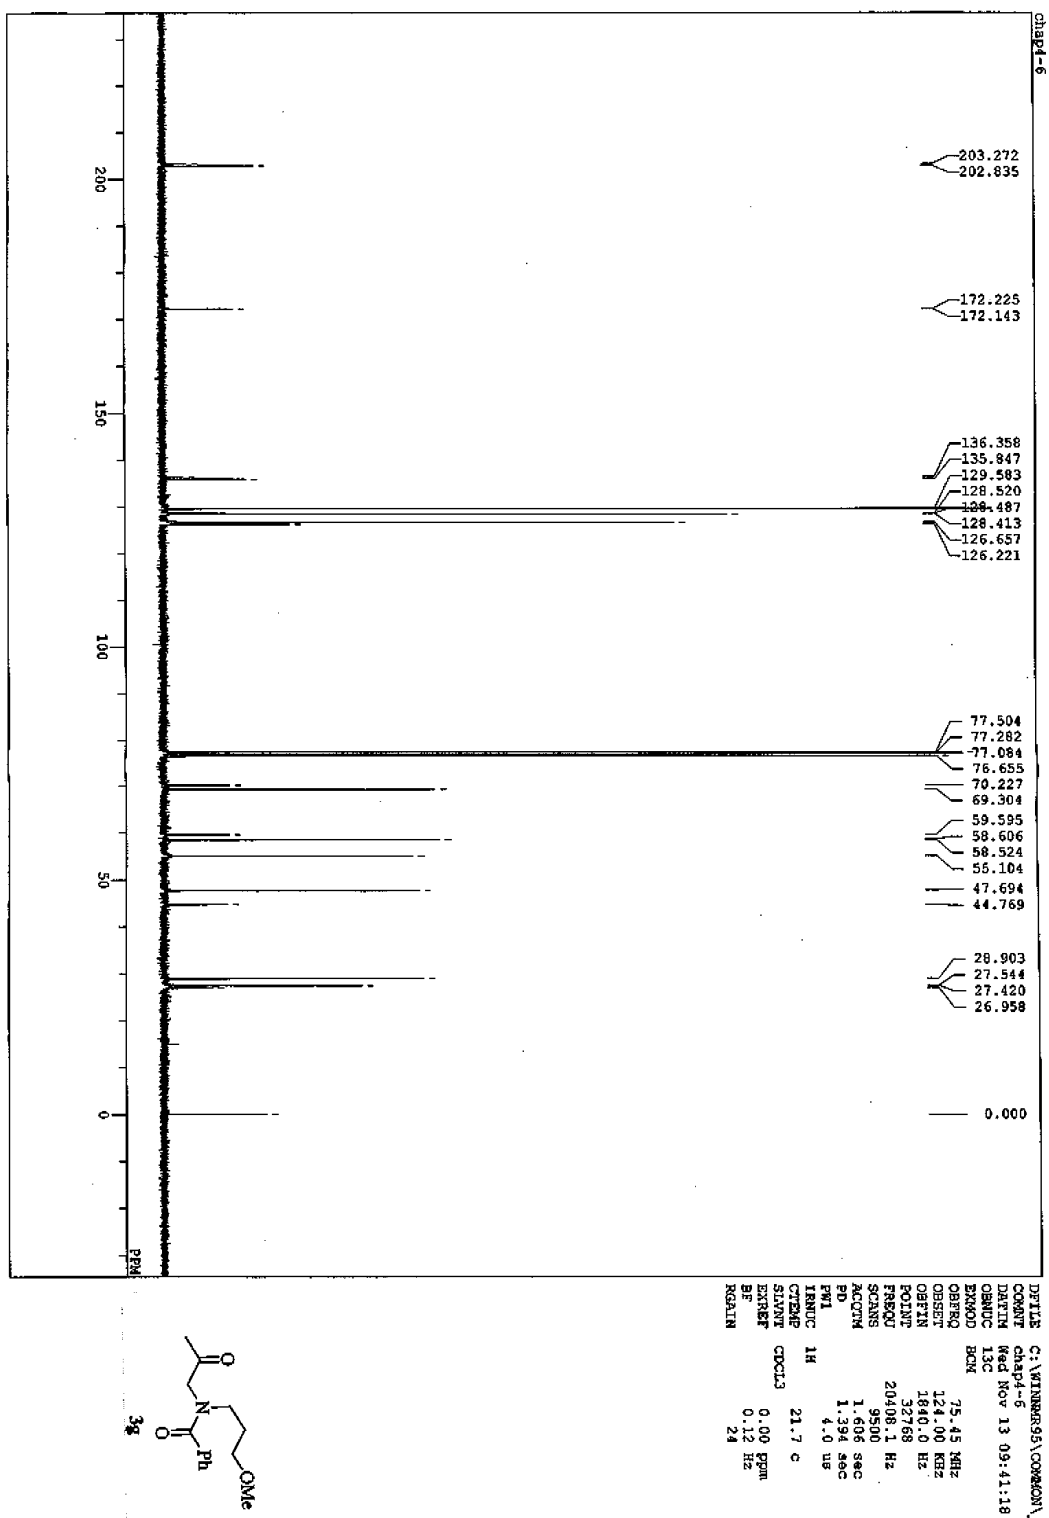

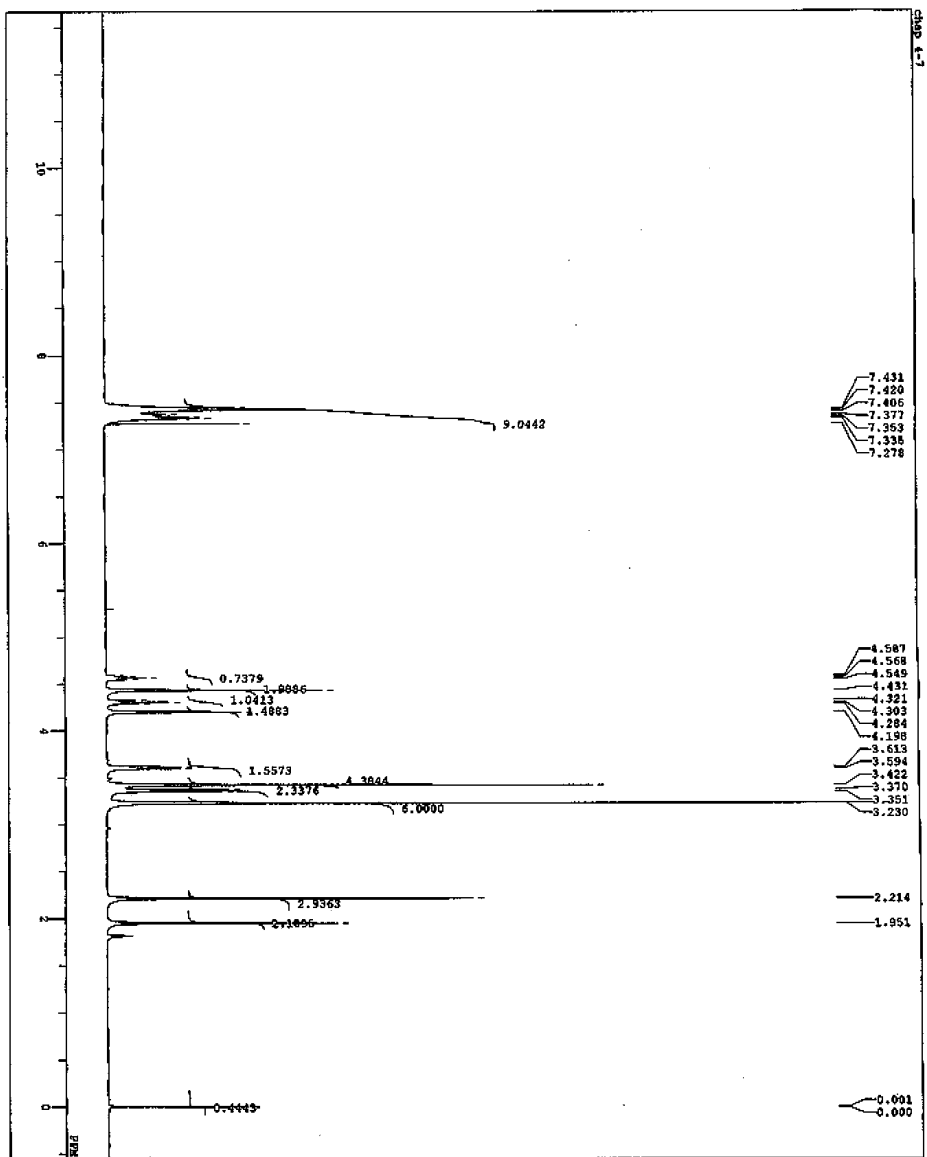

DATE: C:\VIBR\831\CONDOR\1389012.F1  
 NAME: 4-7  
 CHANNEL: 1H  
 PULPROG: zgpg30  
 PROCNO: 1  
 F2: 300.13  
 F1: 750.13  
 AQ: 1.00  
 SI: 32768  
 SF: 300.13  
 DS: 4  
 SCANS: 1  
 EXPT: 1.00  
 ACQ: 1.00  
 PRG: 1.00  
 SLOTT: 0.12  
 RES: 1.00

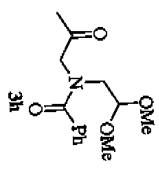

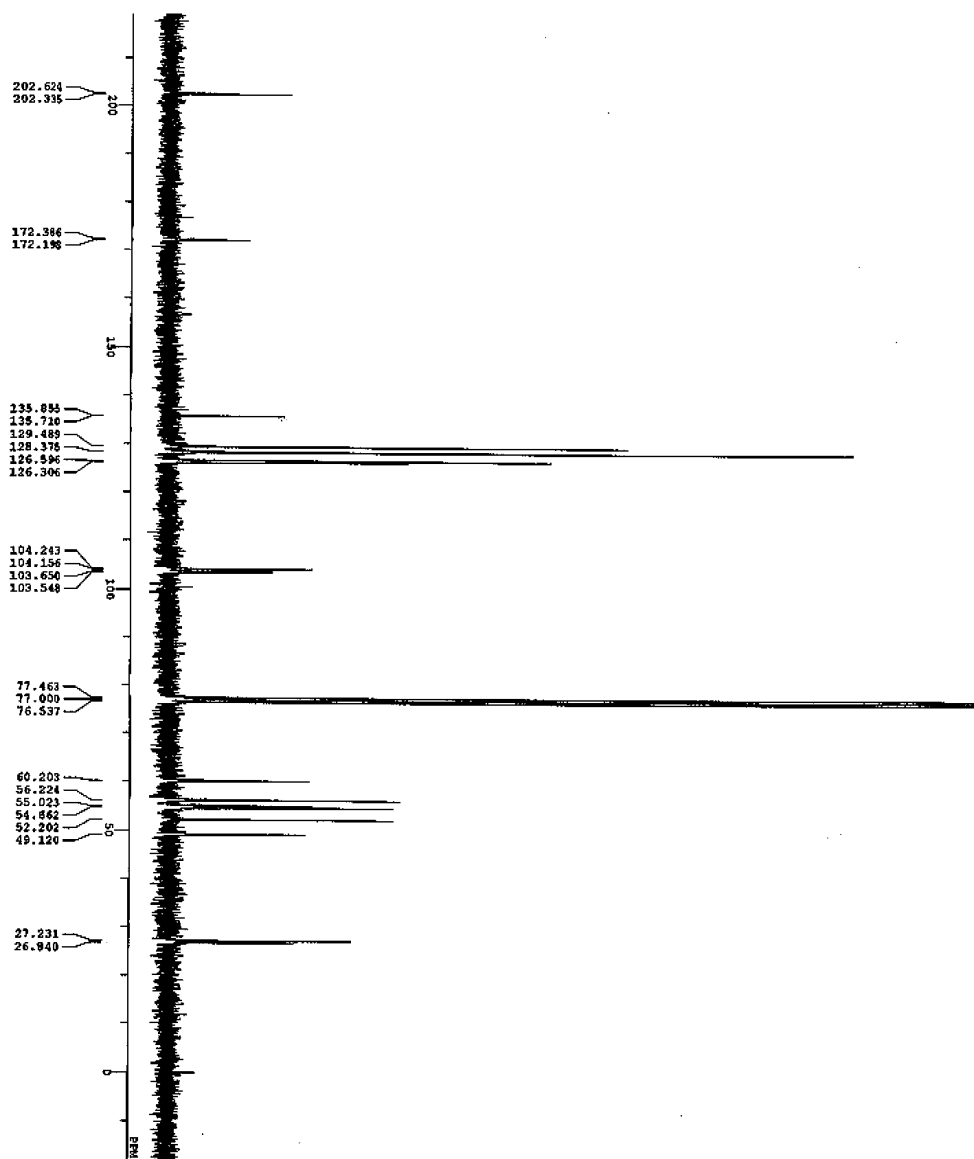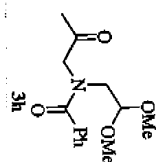

D:\VIBRANTS\COMMON\\_DEFAULT.HL  
 CPDRT 13C  
 NAME 13C  
 ACQD BCU  
 ACQD 37.40 MHz  
 ORG1 135.00 MHz  
 ORG2 135.00 MHz  
 ORG3 5200.0 Hz  
 PULPR 12864  
 PRG1 16193.0 Hz  
 PRG2 16193.0 Hz  
 PC1 1.017 sec  
 PC2 1.000 sec  
 PD 4.0 us  
 PH1  
 PH2  
 IN 1H 23.7 C  
 EXPR COCL3 77.00 ppm  
 EXPR 0.12 Hz  
 BF 31  
 RM1X
